# Supplementary material for: Analysis of the operational conditions to preserve immunobiological products in vaccination rooms in Brazil: a mixed study
Source: Cad Saude Publica. 2024 Aug 23;40(7):e00014924. [Article in Portuguese] doi: 10.1590/0102-311XPT014924 (PMC11346612; doi:10.1590/0102-311XPT014924)
Supplement: Supplementary file 1 [file 1678-4464-csp-40-07-PT014924-s.pdf]

## Material Suplementar

Roteiros semiestruturados norteadores para a etapa qualitativa da pesquisa: análise das condições operacionais para conservação de imunobiológicos nas salas de vacinação do Brasil: estudo misto.

| <b>ROTEIRO NORTEADOR (responsável técnico em imunização estadual)</b> |                                                                                                                                                                                                                                                                                                                                                                                                                                                                                                                                                                                                                                                                                              |
|-----------------------------------------------------------------------|----------------------------------------------------------------------------------------------------------------------------------------------------------------------------------------------------------------------------------------------------------------------------------------------------------------------------------------------------------------------------------------------------------------------------------------------------------------------------------------------------------------------------------------------------------------------------------------------------------------------------------------------------------------------------------------------|
| 1.                                                                    | <p>Que fatores influenciam para a manutenção da cadeia de frio de imunobiológicos nos municípios?</p> <ul style="list-style-type: none"> <li>• Quais as dificuldades</li> <li>• Quais as potencialidades</li> </ul>                                                                                                                                                                                                                                                                                                                                                                                                                                                                          |
| 2.                                                                    | <p>Como se dá o planejamento da logística da cadeia de frio no Estado?</p> <ul style="list-style-type: none"> <li>• Há regionais/distritos</li> <li>• Insumos</li> <li>• Instrumentos para monitoramento das temperaturas (mapas/planilhas)</li> </ul>                                                                                                                                                                                                                                                                                                                                                                                                                                       |
| 3.                                                                    | <p>Como é realizado o transporte dos imunobiológicos da instância estadual para os municípios?</p> <ul style="list-style-type: none"> <li>• Como são realizadas as entregas</li> <li>• Instrumentos de medições</li> <li>• Meios de transporte</li> <li>• Os municípios buscam ou recebem</li> <li>• Quem acompanha o trajeto</li> </ul>                                                                                                                                                                                                                                                                                                                                                     |
| 4.                                                                    | <p>Como se dá o financiamento para equipamentos e insumos da cadeia de frio no Estado?</p> <ul style="list-style-type: none"> <li>• Subfinanciamento ou não</li> <li>• Há prioridades nas compras</li> </ul>                                                                                                                                                                                                                                                                                                                                                                                                                                                                                 |
| 5.                                                                    | <p>Deseja fazer algum comentário adicional?</p> <ul style="list-style-type: none"> <li>• Neste espaço você pode relatar algo acerca de alguma atividade/processo realizada e ou alguma peculiaridade relativa a sala de imunização que você atua, e que não esteja contemplado no questionário. Caso não tenha nada, favor deixar o campo em branco.</li> </ul>                                                                                                                                                                                                                                                                                                                              |
| <b>ROTEIRO NORTEADOR (responsável técnico em imunização regional)</b> |                                                                                                                                                                                                                                                                                                                                                                                                                                                                                                                                                                                                                                                                                              |
| 1.                                                                    | <p>Que fatores influenciam para a manutenção da cadeia de frio de imunobiológicos na sua regional/distrito?</p> <ul style="list-style-type: none"> <li>• Quais a dificuldades</li> <li>• Quais a potencialidades</li> </ul>                                                                                                                                                                                                                                                                                                                                                                                                                                                                  |
| 2.                                                                    | <p>Como se dá a logística da cadeia de frio na regional/distrito?</p> <ul style="list-style-type: none"> <li>• Como é realizado o transporte do nível regional para o nível municipal.</li> <li>• Há uma central de imunização regional</li> <li>• Insumos (caixas térmicas; Termômetros, registradores eletrônicos, mapas/planilhas)</li> <li>• Equipamentos (Câmaras refrigeradas, Câmara fria)</li> <li>• Como são realizadas as entregas</li> <li>• O município busca ou recebe</li> <li>• Meios de transporte</li> <li>• Quem acompanha o trajeto</li> <li>• A caixa é monitorada com termômetros</li> <li>• Há controle da temperatura no momento da entrega nos municípios</li> </ul> |
| 3.                                                                    | <p>Como se dá a aquisição de equipamentos e insumos para a cadeia de frio da regional/distrito?</p> <ul style="list-style-type: none"> <li>• Subfinanciamento ou não</li> <li>• Há prioridades nas compras</li> </ul>                                                                                                                                                                                                                                                                                                                                                                                                                                                                        |
| 4.                                                                    | <p>Como é o processo de contratação e capacitação de profissionais para atuação na regional/distrito?</p> <ul style="list-style-type: none"> <li>• Os profissionais passam por capacitação antes da atuação</li> <li>• São supervisionados por um profissional durante um período</li> </ul>                                                                                                                                                                                                                                                                                                                                                                                                 |
| 5.                                                                    | <p>Como se dá o plano de contingência para casos de falta de energia elétrica na regional/distrito??</p> <ul style="list-style-type: none"> <li>• Quem é comunicado</li> <li>• Para onde são levados os imunobiológicos</li> </ul>                                                                                                                                                                                                                                                                                                                                                                                                                                                           |
| 6.                                                                    | <p>Quando os imunobiológicos são colocados sob suspeita na regional/distrito?</p> <ul style="list-style-type: none"> <li>• Como ocorre este processo</li> <li>• Os profissionais das salas sabem sobre os requisitos</li> <li>• Quem é comunicado</li> <li>• Os imunobiológicos são realocados</li> </ul>                                                                                                                                                                                                                                                                                                                                                                                    |
| 7.                                                                    | <p>Como ocorre a manutenção da geladeira/câmara refrigerada na regional/distrito?</p> <ul style="list-style-type: none"> <li>• Há uma empresa ou profissional para tal atividade</li> <li>• Qual a periodicidade</li> <li>• Teste da bateria</li> </ul>                                                                                                                                                                                                                                                                                                                                                                                                                                      |
| 8.                                                                    | <p>Como ocorre a supervisão das atividades realizadas na regional/distrito?</p> <ul style="list-style-type: none"> <li>• Qual a periodicidade</li> </ul>                                                                                                                                                                                                                                                                                                                                                                                                                                                                                                                                     |

|                                                                        |                                                                                                                                                                                                                                                                                                                                                                                                                                                                                                                                                                                                                                                                                                                   |
|------------------------------------------------------------------------|-------------------------------------------------------------------------------------------------------------------------------------------------------------------------------------------------------------------------------------------------------------------------------------------------------------------------------------------------------------------------------------------------------------------------------------------------------------------------------------------------------------------------------------------------------------------------------------------------------------------------------------------------------------------------------------------------------------------|
|                                                                        | <ul style="list-style-type: none"> <li>Utiliza algum instrumento para tal atividade</li> </ul>                                                                                                                                                                                                                                                                                                                                                                                                                                                                                                                                                                                                                    |
| 9.                                                                     | <p>Deseja fazer algum comentário adicional?</p> <ul style="list-style-type: none"> <li>Neste espaço você pode relatar algo acerca de alguma atividade/processo realizada e ou alguma peculiaridade relativa a sala de imunização que você atua, e que não esteja contemplado no questionário. Caso não tenha nada, favor deixar o campo em branco.</li> </ul>                                                                                                                                                                                                                                                                                                                                                     |
| <b>ROTEIRO NORTEADOR (responsável técnico em imunização municipal)</b> |                                                                                                                                                                                                                                                                                                                                                                                                                                                                                                                                                                                                                                                                                                                   |
| 1.                                                                     | <p>Que fatores influenciam para a manutenção da cadeia de frio de imunobiológicos no seu município?</p> <ul style="list-style-type: none"> <li>Quais as dificuldades</li> <li>Quais as potencialidades</li> </ul>                                                                                                                                                                                                                                                                                                                                                                                                                                                                                                 |
| 2.                                                                     | <p>Como se dá a logística da cadeia de frio no município?</p> <ul style="list-style-type: none"> <li>Como é realizado o transporte do nível regional para o nível municipal.</li> <li>Há uma central de imunização municipal</li> <li>Insumos (caixas térmicas; Termômetros, registradores eletrônicos, mapas/planilhas)</li> <li>Equipamentos (Câmaras refrigeradas, Câmara fria)</li> <li>Como são realizadas as entregas para as salas</li> <li>O município busca ou recebe (Estado/Regional/Distrito)</li> <li>Meios de transporte</li> <li>Quem acompanha o trajeto</li> <li>A caixa é monitorada com termômetros</li> <li>Há controle da temperatura no momento da entrega nas unidades de saúde</li> </ul> |
| 3.                                                                     | <p>Como é realizado o transporte dos imunobiológicos da instância municipal (central de vacinas) para as salas de imunização?</p> <ul style="list-style-type: none"> <li>Como são realizadas as entregas</li> <li>Meios de transporte</li> <li>As salas de imunização buscam ou recebem</li> <li>Quem acompanha o trajeto/rotatividade/profissional exclusivo</li> <li>A caixa é monitorada com termômetros</li> <li>Há controle da temperatura no momento da entrega nas unidades de saúde</li> </ul>                                                                                                                                                                                                            |
| 4.                                                                     | <p>Qual a realidade das salas de imunização no município?</p> <ul style="list-style-type: none"> <li>Estrutura físicas das unidades de APS/Salas (casas adaptadas ou construídas/normas do PNI)</li> </ul>                                                                                                                                                                                                                                                                                                                                                                                                                                                                                                        |
| 5.                                                                     | <p>Como se dá a aquisição de equipamentos e insumos para a cadeia de frio?</p> <ul style="list-style-type: none"> <li>Subfinanciamento ou não</li> <li>Há prioridades nas compras</li> </ul>                                                                                                                                                                                                                                                                                                                                                                                                                                                                                                                      |
| 6.                                                                     | <p>Como é o processo de contratação e capacitação de profissionais para atuação nas salas de imunização?</p> <ul style="list-style-type: none"> <li>Os profissionais passam por capacitação antes da atuação</li> <li>São supervisionados por um profissional durante um período</li> </ul>                                                                                                                                                                                                                                                                                                                                                                                                                       |
| 7.                                                                     | <p>Como se dá o plano de contingência para casos de falta de energia elétrica?</p> <ul style="list-style-type: none"> <li>Quem é comunicado</li> <li>Para onde são levados os imunobiológicos</li> </ul>                                                                                                                                                                                                                                                                                                                                                                                                                                                                                                          |
| 8.                                                                     | <p>Quando os imunobiológicos são colocados sob suspeita?</p> <ul style="list-style-type: none"> <li>Como ocorre este processo</li> <li>Os profissionais das salas sabem sobre os requisitos</li> <li>Quem é comunicado</li> <li>Os imunobiológicos são realocados</li> </ul>                                                                                                                                                                                                                                                                                                                                                                                                                                      |
| 9.                                                                     | <p>Como ocorre a manutenção da geladeira/câmara refrigerada das salas do município?</p> <ul style="list-style-type: none"> <li>Há uma empresa ou profissional para tal atividade</li> <li>Qual a periodicidade</li> <li>Teste da bateria</li> </ul>                                                                                                                                                                                                                                                                                                                                                                                                                                                               |
| 10.                                                                    | <p>Como ocorre a supervisão das atividades realizadas nas salas de imunização do município?</p> <ul style="list-style-type: none"> <li>Qual a periodicidade</li> <li>Utiliza algum instrumento para tal atividade</li> </ul>                                                                                                                                                                                                                                                                                                                                                                                                                                                                                      |
| 11.                                                                    | <p>Como ocorrem as capacitações acerca da temática vacinação?</p> <ul style="list-style-type: none"> <li>Qual a periodicidade</li> <li>Quais assuntos são abordados</li> <li>De qual maneira (palestras, convidados)</li> </ul>                                                                                                                                                                                                                                                                                                                                                                                                                                                                                   |
| 12.                                                                    | <p>No último ano houve alguma perda de imunobiológicos no município por falhas de conservação?</p> <ul style="list-style-type: none"> <li>Quais os motivos</li> <li>Falha no transporte (qual instância)</li> </ul>                                                                                                                                                                                                                                                                                                                                                                                                                                                                                               |
| 13.                                                                    | <p>Deseja fazer algum comentário adicional?</p> <ul style="list-style-type: none"> <li>Neste espaço você pode relatar algo acerca de alguma atividade/processo realizada e ou alguma peculiaridade relativa a sala de imunização que você atua, e que não esteja contemplado no questionário. Caso não tenha nada, favor deixar o campo em branco.</li> </ul>                                                                                                                                                                                                                                                                                                                                                     |
| <b>ROTEIRO NORTEADOR (profissionais da equipe de enfermagem)</b>       |                                                                                                                                                                                                                                                                                                                                                                                                                                                                                                                                                                                                                                                                                                                   |
| 1.                                                                     | Como você compreende a conservação dos imunobiológicos na sua rotina de trabalho?                                                                                                                                                                                                                                                                                                                                                                                                                                                                                                                                                                                                                                 |
| 2.                                                                     | Como é a conservação dos imunobiológicos na sua Unidade de Saúde?                                                                                                                                                                                                                                                                                                                                                                                                                                                                                                                                                                                                                                                 |

|     |                                                                                                                                                                                                                                                                                                                                                                     |
|-----|---------------------------------------------------------------------------------------------------------------------------------------------------------------------------------------------------------------------------------------------------------------------------------------------------------------------------------------------------------------------|
| 3.  | Qual é a estrutura da sua sala de imunização?<br>• Estrutura físicas das unidades de APS/Salas (casas adaptadas ou construídas conforme normas do PNI)                                                                                                                                                                                                              |
| 4.  | Como é realizado o transporte dos imunobiológicos da instância municipal (central de vacinas) para as salas de imunização?<br>• Como são realizadas as entregas<br>• Meios de transporte<br>• Os municípios buscam ou recebem<br>• Quem acompanha o trajeto<br>• Periodicidade da requisição (semanalmente? quinzenal?)                                             |
| 5.  | Como é realizado o procedimento de montagem das caixas térmicas para o armazenamento dos imunobiológicos, no dia-a-dia?<br>• Que materiais são utilizados<br>• Ambientação das bobinas<br>• Imunobiológicos em recipientes (evitar conta direto com as bobinas)<br>• Limpeza da caixa térmica para uso diário<br>• Condições da caixa térmica (isopor, Poliuretano) |
| 6.  | Como se dá a organização dos imunobiológicos na geladeira/câmara refrigerada? E nas caixas térmicas?<br>• Sistema PEPS<br>• Divisão (vacinas bacterianas e virais)<br>• Organização (adulto/criança/identificação)                                                                                                                                                  |
| 7.  | Durante o período de trabalho, como ocorre o monitoramento das temperaturas da geladeira/câmara refrigerada e das caixas térmicas?<br>• Registro dos mapas de temperatura (periodicidade)                                                                                                                                                                           |
| 8.  | Como se dá o plano de contingência para casos de falta de energia elétrica?<br>• Como é o procedimento (suspensão das atividades?)<br>• Quem é comunicado<br>• Para onde são levados os imunobiológicos                                                                                                                                                             |
| 9.  | Quando os imunobiológicos são colocados sob suspeita?<br>• Conhecimento sobre o tema<br>• Como ocorre este processo<br>• Quem é comunicado<br>• Os imunobiológicos são realocados                                                                                                                                                                                   |
| 10. | Como é realizada a limpeza da geladeira/câmara refrigerada e das caixas térmicas?<br>• Remanejamento dos imunobiológicos<br>• Quem realiza<br>• Qual periodicidade<br>• Os imunobiológicos são realocados                                                                                                                                                           |
| 11. | Como ocorre a manutenção preventiva da geladeira/câmara refrigerada?<br>• Há uma empresa ou profissional para tal atividade<br>• Qual a periodicidade<br>• Teste da bateria                                                                                                                                                                                         |
| 12. | Como ocorre a supervisão das atividades realizadas na sala de imunização?<br>• Enfermeiro da unidades de APS e/ou RTIM<br>• Qual a periodicidade<br>• Utiliza algum instrumento para tal atividade                                                                                                                                                                  |
| 13. | Como ocorrem as capacitações acerca da temática vacinação?<br>• Qual a periodicidade (último ano/atual houve alguma)<br>• Quais assuntos são abordados<br>• De qual maneira (palestras, convidados)<br>• Capacitações na unidade? Ou na central?                                                                                                                    |
| 14. | No último ano houve alguma perda de imunobiológicos na sala de imunização por falhas de conservação?<br>• Quais os motivos<br>• Falha no transporte (qual instância)                                                                                                                                                                                                |
| 15. | Deseja fazer algum comentário adicional?<br>• Neste espaço você pode relatar algo acerca de alguma atividade/processo realizada e ou alguma peculiaridade relativa a sala de imunização que você atua, e que não esteja contemplado no questionário. Caso não tenha nada, favor deixar o campo em branco.                                                           |

APS: atenção primária à saúde; PNI: Programa Nacional de Imunização; RTIM: responsável técnico em imunização municipal.
